# Supplementary material for: Adipose-specific deletion of the cation channel TRPM7 inhibits TAK1 kinase-dependent inflammation and obesity in male mice
Source: PubMed Central journal article supplement (PMC9887063; doi:10.1038/s41467-023-36154-3), 2023-01-30
Supplement: 41467_2023_36154_MOESM1_ESM.pdf [file 41467_2023_36154_MOESM1_ESM.pdf]

**Adipose-specific deletion of the cation channel TRPM7 inhibits TAK1 kinase-dependent inflammation and obesity in male mice**

Weiting Zhong<sup>1,#</sup>, Mingming Ma<sup>2,#</sup>, Jingwen Xie<sup>1</sup>, Chengcui Huang<sup>1</sup>, Xiaoyan Li<sup>1,\*</sup>, Min Gao<sup>1,#,\*</sup>

<sup>1</sup> Department of Pharmacy, the Sixth Affiliated Hospital, Sun Yat-sen University, Guangzhou 510655, China

<sup>2</sup> Department of Pharmacology, Cardiac and Cerebral Vascular Research Center, Zhongshan School of Medicine, Sun Yat-sen University, Guangzhou 510080, China

# These authors contributed equally: Min Gao, Weiting Zhong, Mingming Ma

\* Correspondence: lixian5@mail.sysu.edu.cn; gaom9@mail.sysu.edu.cn (Lead Contact)

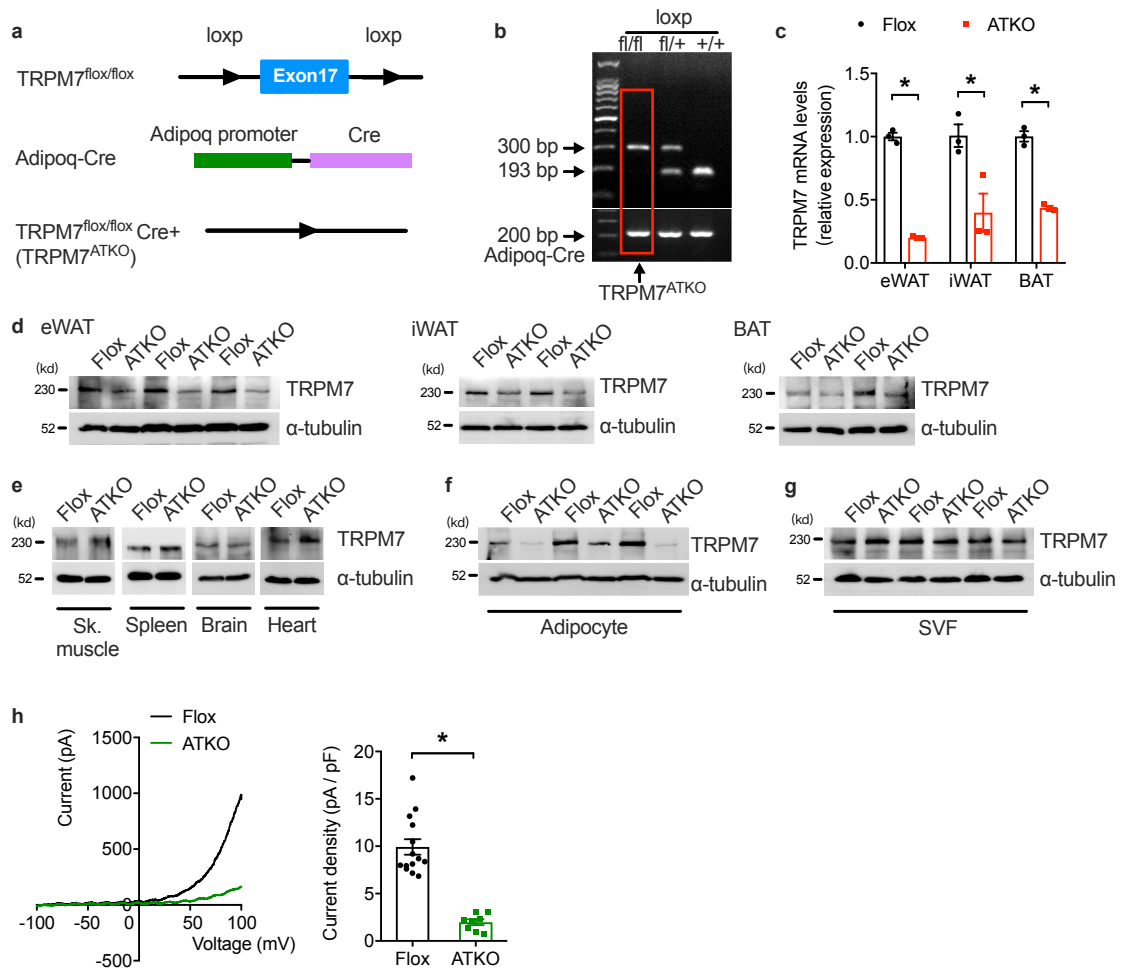

**Supplementary Fig. 1. Generation of adipose-specific TRPM7-knockout mice.** **a.** Schematic diagram of transgenic mice used to generate ATKO ( $TRPM7^{ATKO}$ ) mice. Adipocyte-specific knockout strategy where triangles designate LoxP sites flanking exon 17 of TRPM7. **b.** Mice were identified by PCR amplified from mouse genomic DNA using primers specific for Loxp-1, Loxp-2 and Adipoq-Cre respectively. **c.** qPCR analysis of TRPM7 mRNA expression in adipose tissue from Flox and ATKO mice ( $n=3$  mice). **d-g.** Western blot analysis of TRPM7 protein level in adipose tissues (**d**,  $n=3$  mice), skeletal muscle, spleen, brain and heart (**e**,  $n=3$  mice), isolated adipocytes (**f**,  $n=3$  mice) and stromal vascular fraction (SVF) (**g**,  $n=3$  mice) from Flox and ATKO mice. **h.** A representative I-V relationship of whole-cell  $I_{TRPM7}$  in freshly isolated adipocytes from Flox and ATKO mice ( $n=14$  cells for Flox,  $n=8$  cells for ATKO, from three mice each group). The statistics of TRPM7 current densities were quantified in bar chart are shown. Statistical data were assessed using two-sided Student's t test (Supplementary Fig. 1c and 1h) and are presented as mean  $\pm$  SEM. \* $p<0.05$ . Source data are provided as a Source Data file. kd, relative molecular weight in kilodalton.

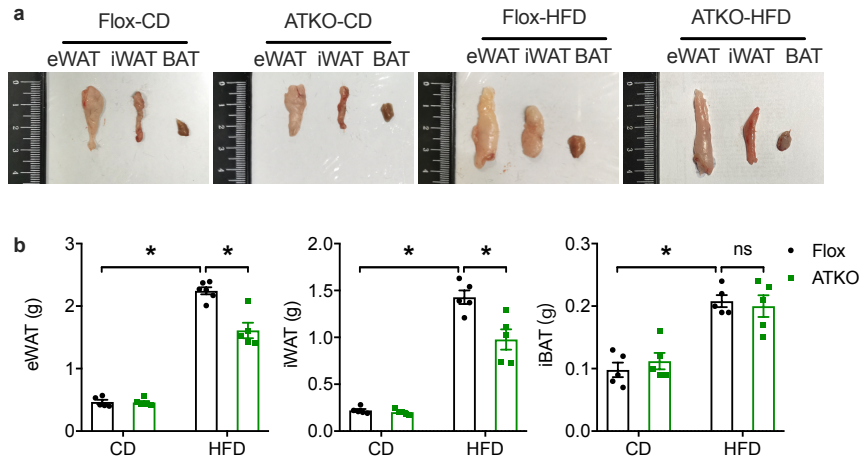

**Supplementary Fig. 2. TRPM7 deficiency decreases white adipose tissue weight. a.** Representative photographs of fat pads (eWAT, iWAT and BAT). **b.** The weight of eWAT (n=5 mice for Flox-CD and ATKO-HFD, n=6 mice for ATKO-CD and Flox-HFD), iWAT (n=5 mice) and BAT (n=5 mice). Statistical data in **b** were assessed using one-way ANOVA statistical analysis (Supplementary Fig. 2b) and are presented as mean  $\pm$  SEM. \*p<0.05. Source data are provided as a Source Data file.

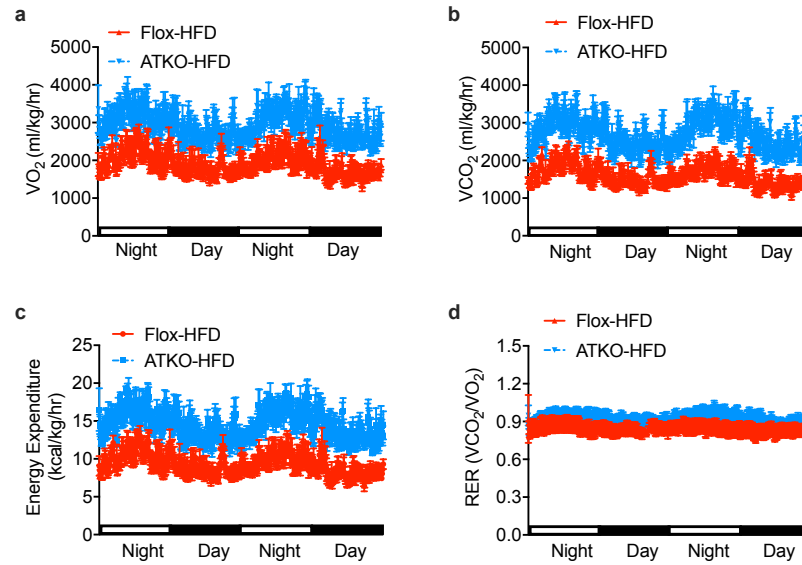

**Supplementary Fig. 3. TRPM7 ablation increases basic metabolic activity.** Related to Fig. 1. TRPM7 knockout protects against diet-induced obesity by increasing energy expenditure. Whole-body oxygen consumption ( $VO_2$ ) (a), carbon dioxide production ( $VCO_2$ ) (b), respiratory exchange ratio ( $VCO_2/VO_2$ ) (c) and energy expenditure rate (d) monitored continuously over a 24-h period (n=6 mice). The average  $VO_2$ ,  $VCO_2$ ,  $VCO_2/VO_2$  and energy expenditure rate during 12-h light/12-h dark periods are showed in Fig. 1. Statistical data are presented as mean  $\pm$  SEM. Source data are provided as a Source Data file.

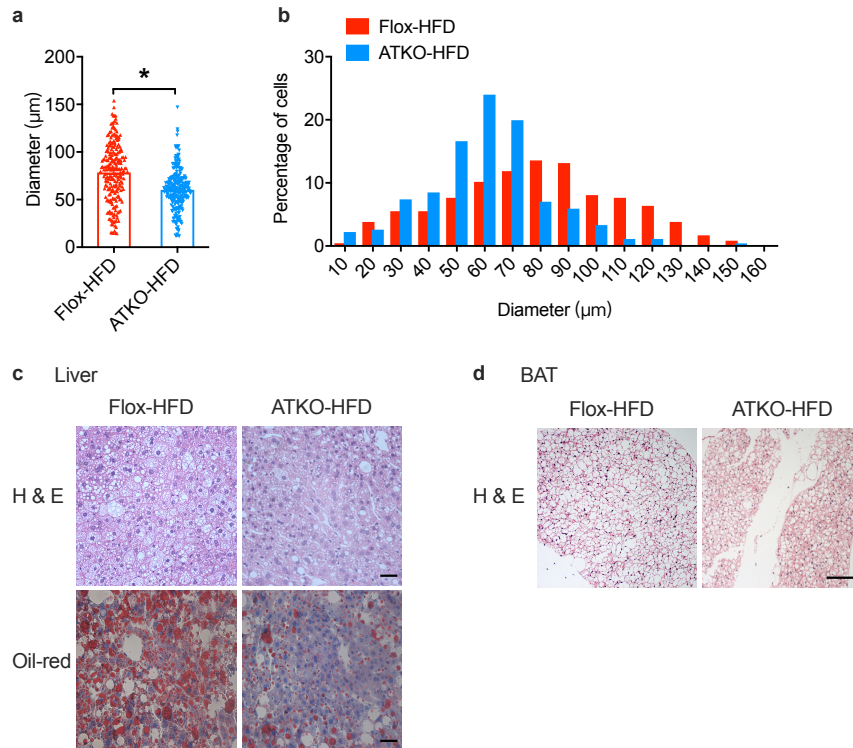

**Supplementary Fig. 4. TRPM7 ATKO mice display a reduced adiposity and are resistant to diet-induced hepatic steatosis.** **a-b.** Quantification of adipocyte diameter and distribution of Flox and ATKO mice fed with CD or HFD (n=236 cells from 4 mice for Flox-HFD, n=271 cells from 6 mice for ATKO-HFD). **c-d.** Representative H&E images of liver, liver oil red O staining (**c**), and H&E images of BAT (**d**) from the indicated groups (scale bar, 100  $\mu\text{m}$ ) (n=3 mice). Statistical data in **a** were assessed using two-sided Student's t test (Supplementary Fig. 4a) and are presented as mean  $\pm$  SEM. \*p<0.05. Source data are provided as a Source Data file.

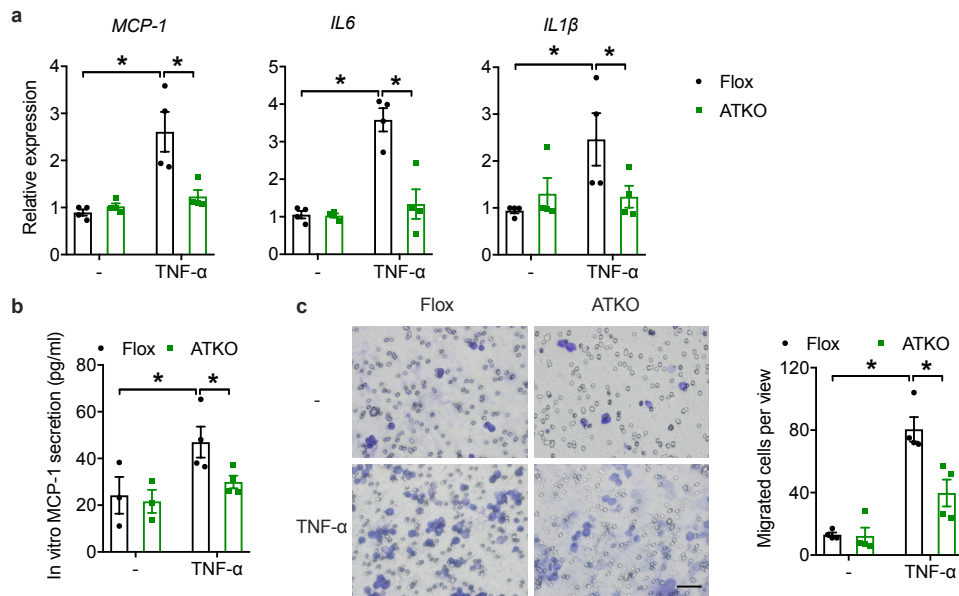

**Supplementary Fig. 5. TRPM7 knockdown attenuates adipocyte inflammation.** Related to Fig. 3. **a.** The indicated gene expression of *MCP-1*, *IL6*, *IL1β* in primary adipocytes (n=4 biologically independent experiments). **b.** Protein secretion of MCP-1 in adipocytes treated with or without TNF-α (n=3 biologically independent experiments treated without TNF-α, n=4 biologically independent experiments treated with TNF-α). **c.** Effect of conditional medium from Flox and ATKO primary adipocytes treated with or without TNF-α on macrophage chemotaxis (scale bar, 50 μm) (n=4 biologically independent experiments). Statistical data were assessed using one-way ANOVA statistical analysis (Supplementary Fig. 5a-5c) and are presented as mean ± SEM. \*p<0.05. Source data are provided as a Source Data file.

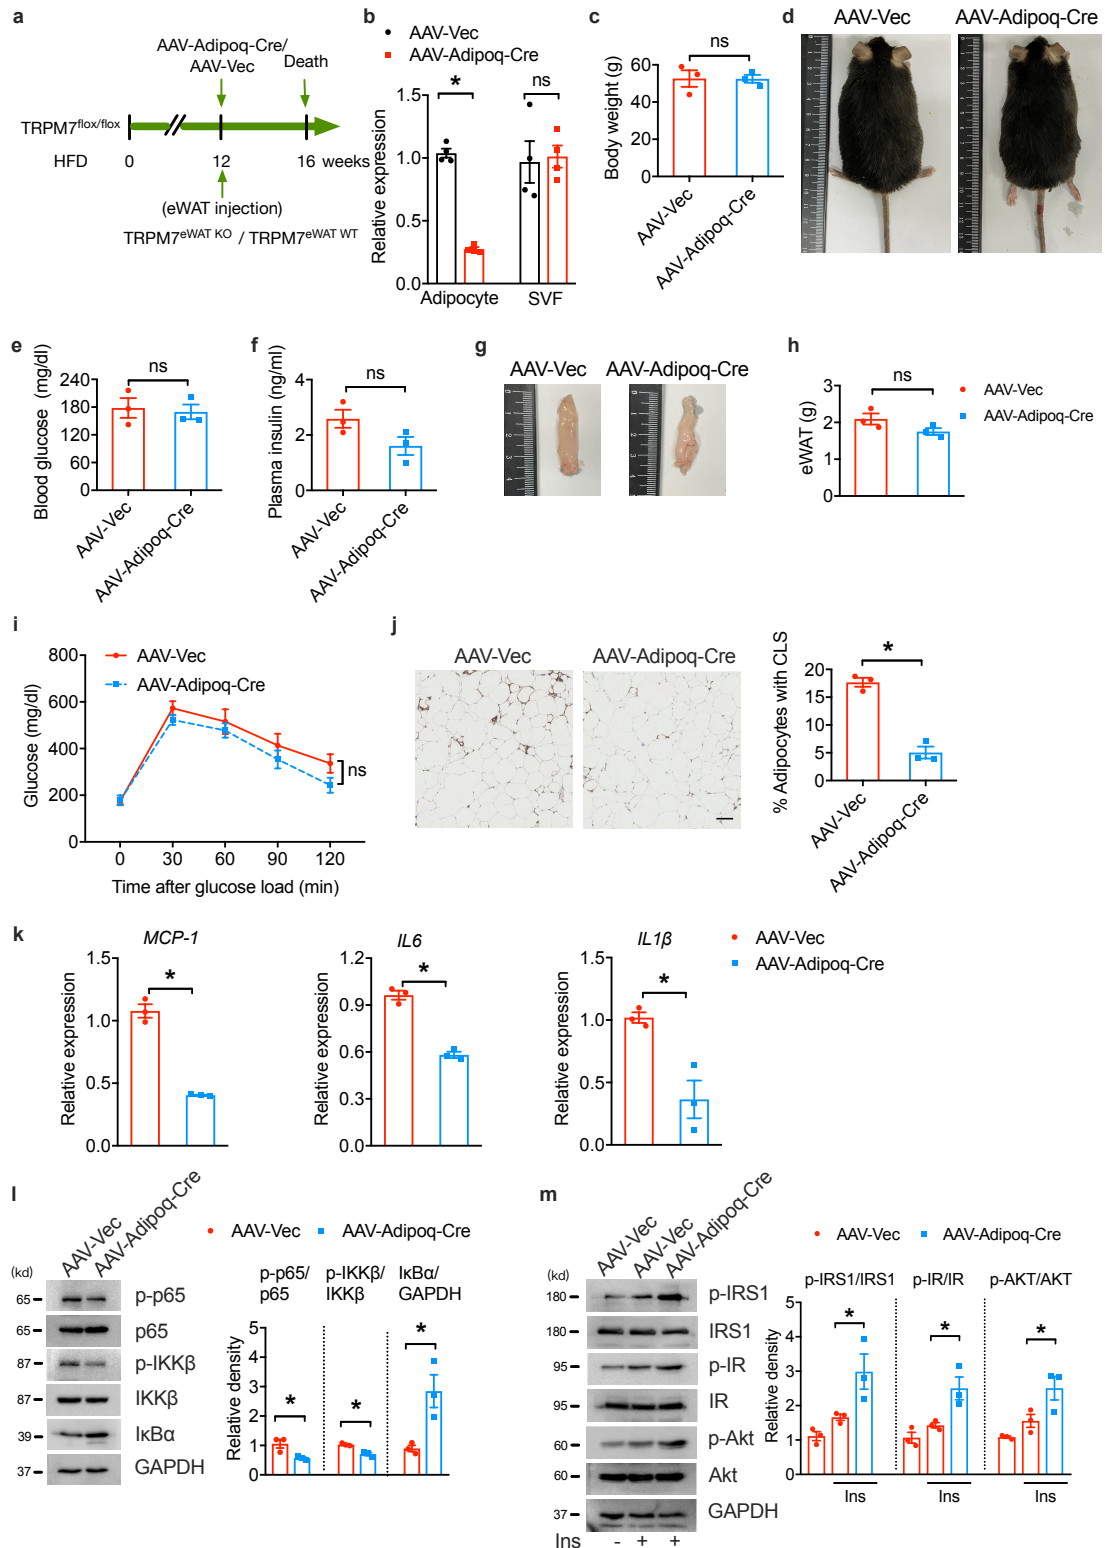

**Supplementary Fig. 6. TRPM7 deficiency mitigates adipose inflammation independent of body weight loss.** **a.** Schematic representation of TRPM7<sup>eWAT KO</sup> mice by AAV-Cre administration. **b.** TRPM7 mRNA levels in isolated adipocytes and SVF from eWAT of TRPM7<sup>eWAT WT</sup> (WT) and TRPM7<sup>eWAT KO</sup> mice after induction (n=4 mice). **c.** Body weight of HFD WT and TRPM7<sup>eWAT KO</sup> (n=3 mice). **d.** Representative photographs of WT and TRPM7<sup>eWAT KO</sup> mice fed with HFD (n=3 mice). **e-f.** Blood glucose and insulin levels (n=3 mice). **g-h.** Weights of eWAT between WT and

TRPM7<sup>eWAT KO</sup> mice (n=3 mice). **i.** TRPM7 knockout in eWAT slightly ameliorates glucose intolerance with no significance (n=3 mice). **j.** Macrophages were stained by using an antibody to F4/80. ATMs (adipose tissue macrophages) were quantitated by measurement of F4/80 staining of tissue sections using Image J software (scale bar, 100  $\mu$ m) (n=3 mice). **k.** The relative expression of the proinflammation genes were measured by qPCR assays of mRNA (n=3 mice). **l.** Phosphorylation of IKK $\beta$  and NF- $\kappa$ B p65 and I $\kappa$ B $\alpha$  expression in eWAT (n=3 mice). **m.** The WT and TRPM7<sup>eWAT KO</sup> mice were fasted overnight, treated by i.p. injection with 0.75 U/kg insulin, and examined by immunoblot analysis of eWAT by probing with antibodies to phospho-IRS1, phospho-IR, phospho-AKT, IRS1, IR and AKT (n=3 mice). Statistical data were assessed using two-sided Student's t test (Supplementary Fig. 6b, 6c, 6e, 6f, 6h-6l) or one-way ANOVA statistical analysis (Supplementary Fig. 6m) and are presented as mean  $\pm$  SEM. \*p<0.05. Source data are provided as a Source Data file. kd, relative molecular weight in kilodalton; ns, not significant; vec, vector.



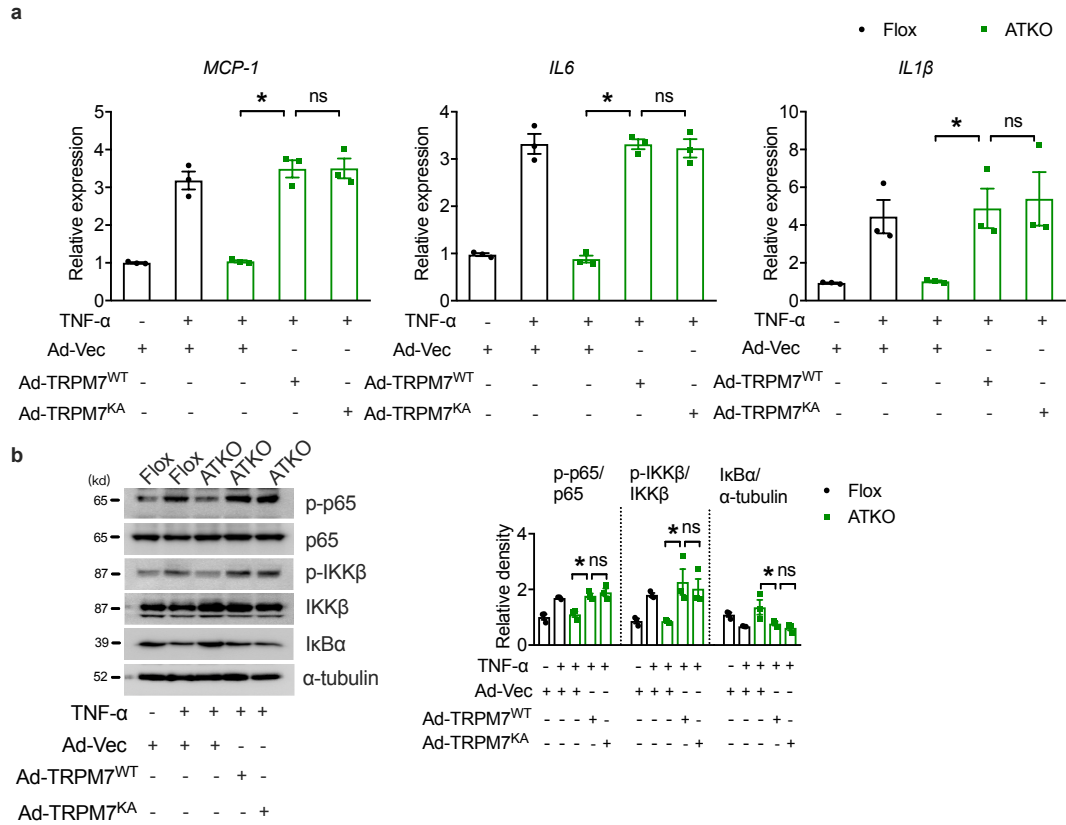

**Supplementary Fig. 7. The kinase activity of TRPM7 does not take part in adipocyte inflammation.** **a.** Cultured primary adipocytes were transfected with TRPM7 adenovirus (TRPM7 wild type, Ad-TRPM7<sup>WT</sup>) or TRPM7 kinase dead mutant adenovirus (K1646A, Ad-TRPM7<sup>KA</sup>), and their control adenovirus (Ad-Vec) respectively. Adipocytes were treated with TNF- $\alpha$  (40 ng/ml) for 12 h and gene expression of *MCP-1*, *IL6*, *IL1 $\beta$*  was measured using qPCR (n=3 biologically independent experiments). **b.** Adipocytes were lysed for immunoblotting with the indicated antibodies (n=3 biologically independent experiments). Statistical data were assessed using one-way ANOVA statistical analysis (Supplementary Fig. 7a-7b) and are presented as mean  $\pm$  SEM. \*p<0.05. Source data are provided as a Source Data file. kd, relative molecular weight in kilodalton.

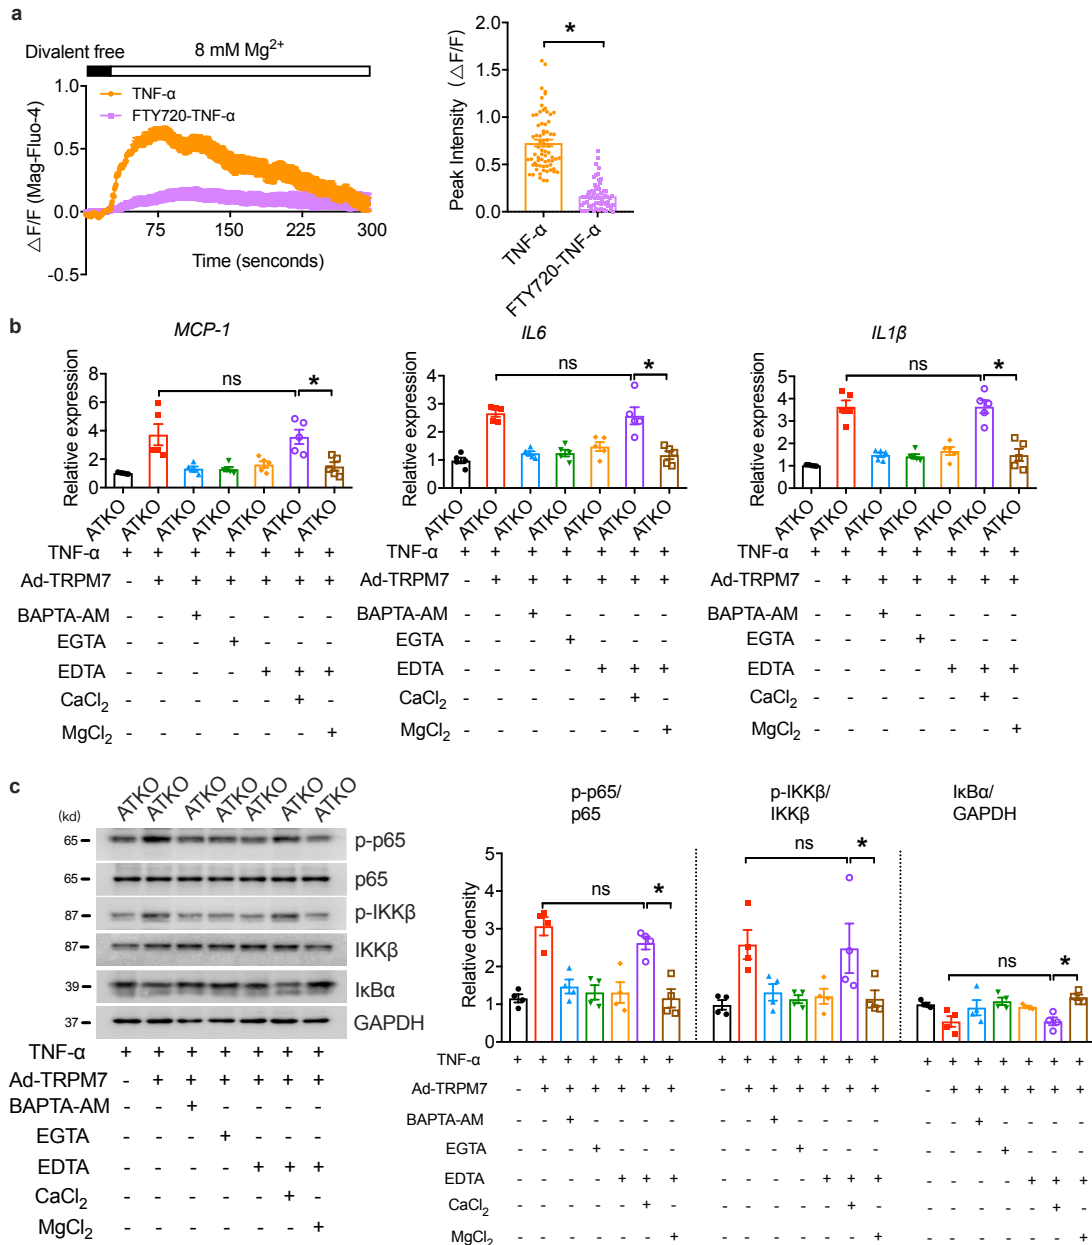

**Supplementary Fig. 8. TRPM7-dependent  $Mg^{2+}$  influx does not account for adipocyte inflammation.** **a.** Time-course changes in intracellular  $Mg^{2+}$  ( $[Mg^{2+}]_i$ ) quantified by measuring the peak fluorescence intensity. Adipocytes were incubated in divalent-free solution (DVF,  $Ca^{2+}$ , and  $Mg^{2+}$ -free) supplemented with 4  $\mu M$  Mag-Fluo-4 (ThermoFisher Scientific) in the dark for 30 min. Real-time images were captured using a Zeiss LSM880 microscope (Carl Zeiss, Oberkochen, Germany). Adipocytes were bathed in DVF medium with addition of 8 mM  $MgCl_2$  to measure  $Mg^{2+}$  influx (n=69 cells treated with TNF- $\alpha$ , n=61 cells treated with FTY720+TNF- $\alpha$ , from three independent experiments). **b.** Adipocytes were incubated in DMEM/F12 medium supplemented with EDTA (5 mM), EGTA (5 mM), BAPTA-AM (10  $\mu M$ ), excess  $Ca^{2+}$  (15 mM) over EDTA (5 mM), or excess  $Mg^{2+}$  (15 mM) over EDTA (5 mM), respectively, and treated with TNF- $\alpha$  (40 ng/ml; 12 h). qPCR analysis revealed that increasing  $Ca^{2+}$  (excess  $Ca^{2+}$  over EDTA) but not  $Mg^{2+}$  (excess  $Mg^{2+}$  over EDTA) in adipocytes reproduced the TNF- $\alpha$ -induced inflammatory genes expression found in control adipocytes (n=5 biologically independent experiments). **c.** Western blots analysis

of the indicated proteins in adipocytes stimulation with TNF- $\alpha$  (60 ng/ml) for 15 min (n=4 biologically independent experiments). Statistical data were assessed using two-sided Student's t test (Supplementary Fig. 8a) or one-way ANOVA statistical analysis (Supplementary Fig. 8b-8c) and are presented as mean  $\pm$  SEM. \*p<0.05. Source data are provided as a Source Data file. kd, relative molecular weight in kilodalton; ns, not significant.

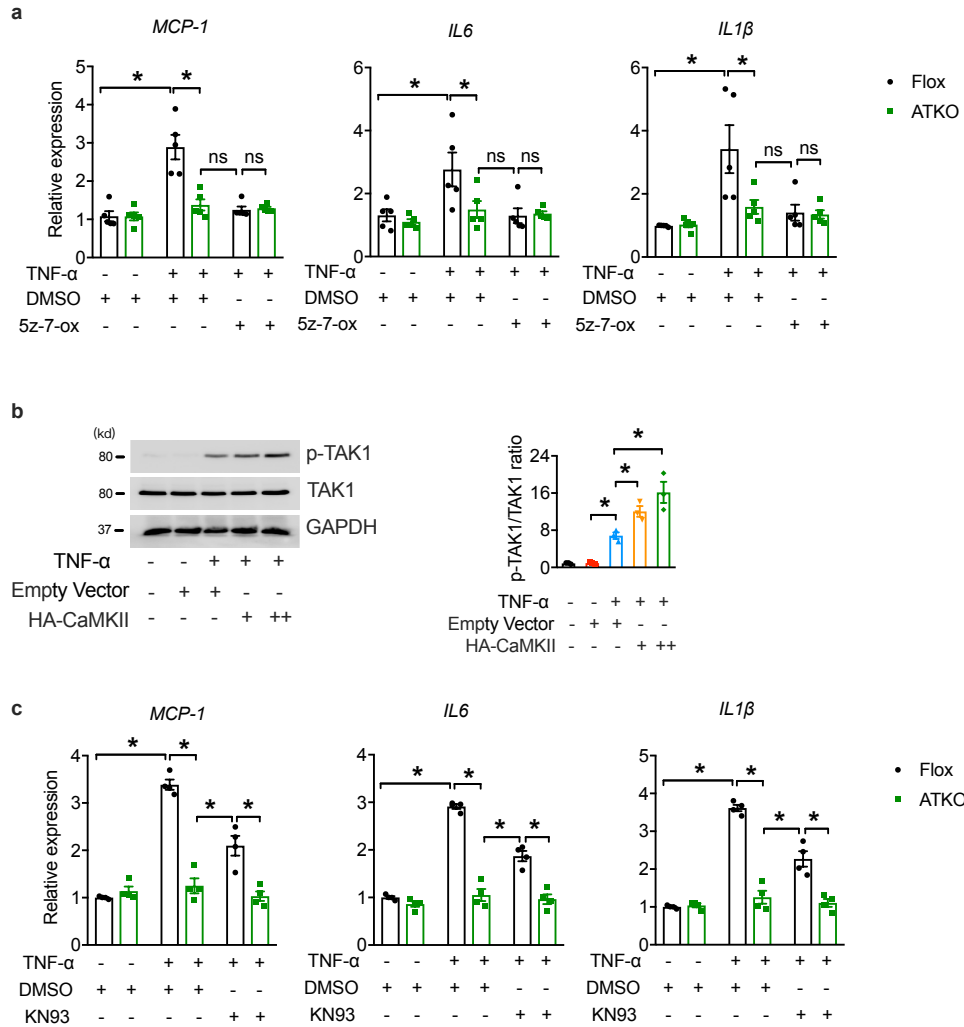

**Supplementary Fig. 9. CaMKII-TAK1 cascade participates in TRPM7-dependent inflammation.** Related to Fig. 5. **a.** Gene expression of *MCP-1*, *IL6*, *IL1β* in differentiated adipocytes incubated with DMSO or TAK1 inhibitor 5z-7-ox (100 nM) for 30 min, then stimulated with TNF-α (40 ng/ml; 12 h) or not (n=5 biologically independent experiments). **b.** Immunoblot analysis of 3T3-L1 adipocytes transiently overexpressing HA-CaMKII for 24 h, followed with or without 60 ng/ml TNF-α treatment for 15 min (n=3 biologically independent experiments). **c.** qPCR analysis of relative *MCP-1*, *IL6*, *IL1β* mRNA levels in differentiated adipocytes pretreated with CaMKII inhibitor KN93 (10 μM; 30 min) before stimulating with TNF-α (40 ng/ml; 12 h) (n=4 biologically independent experiments). Statistical data were assessed using one-way ANOVA statistical analysis (Supplementary Fig. 9a-9c) and are presented as mean ± SEM. \*p<0.05. Source data are provided as a Source Data file. kd, relative molecular weight in kilodalton; ns, not significant.

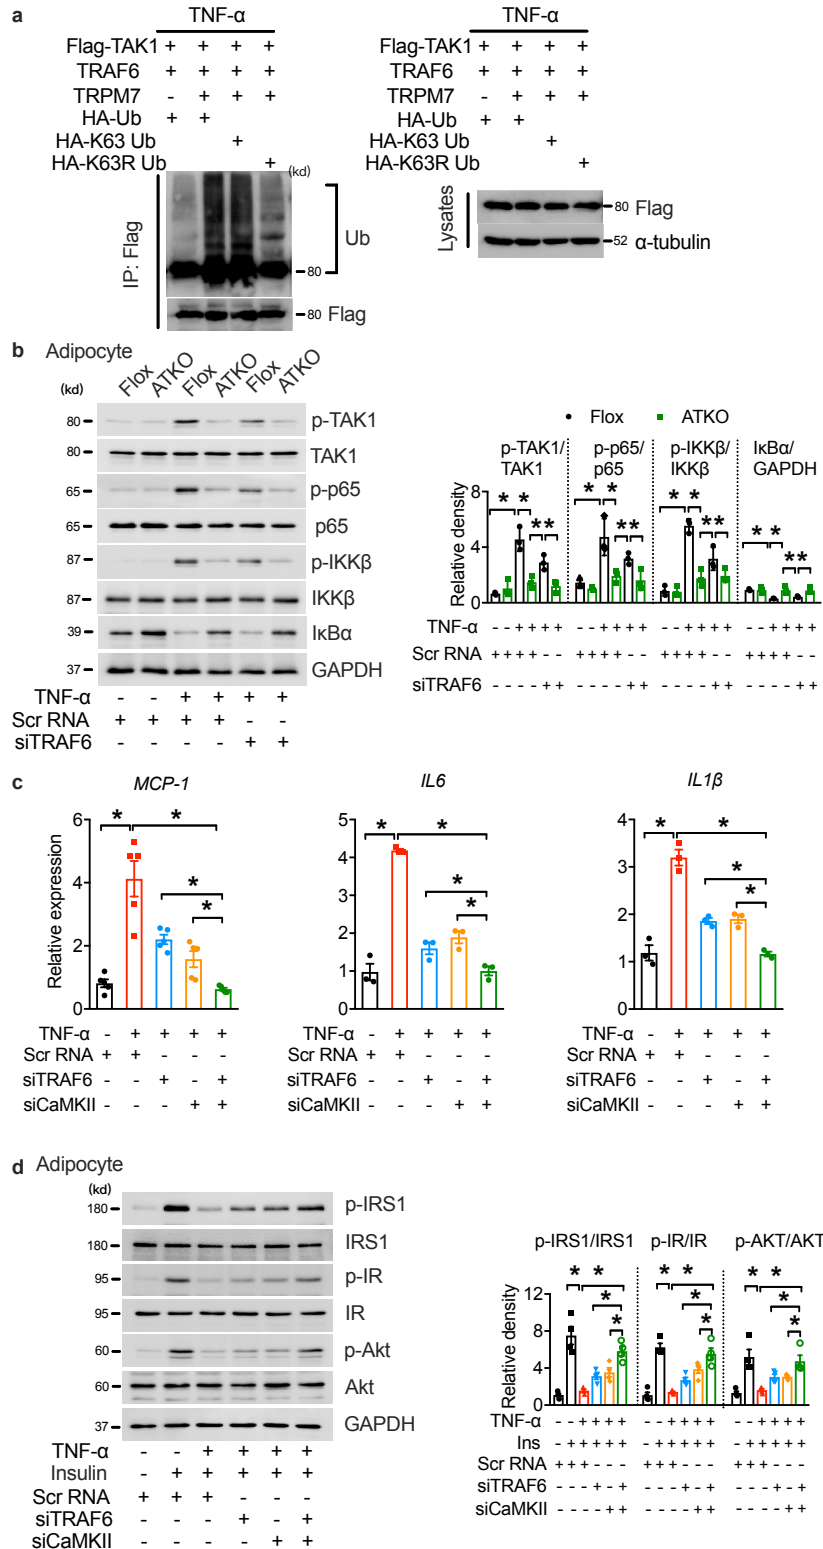

**Supplementary Fig. 10. Both TRAF6 and CaMKII together mediates TRPM7-dependent adipocyte inflammation.** Related to Fig. 6. **a.** Ubiquitination levels of TAK1 after overexpression of TRAF6 and Flag-TAK1 and in response to TNF- $\alpha$  treatment (60 ng/ml; 30 min) in HEK293T cells cotransfected with TRPM7 and the indicated HA-tagged K63 or K63R ubiquitin. K63R indicates ubiquitin at K63 was mutated (n=3 biologically independent experiments). **b.** Phosphorylated and total TAK1, p65, IKK $\beta$ , I $\kappa$ B $\alpha$  in primary adipocytes of Flox and ATKO mice

challenged with TNF- $\alpha$  (60 ng/ml; 15 min) (n=3 biologically independent experiments). **c.** The levels of indicated mRNA were analyzed by qPCR. Differentiated 3T3-L1 adipocytes were transfected with TRAF6 siRNA, CaMKII siRNA or scramble siRNA as indicated for 24 hours and then treated with TNF- $\alpha$  (n=5 biologically independent experiments for *MCP-1*, n=3 biologically independent experiments for *IL6* and *IL1 $\beta$* ). **d.** Insulin (100 nM; 15 min)-stimulated activation of insulin signaling was examined by western blotting in 3T3-L1 adipocytes transfected with TRAF6 siRNA, CaMKII siRNA or scramble siRNA and treated with TNF- $\alpha$  (60 ng/ml; 15 min) (n=4 biologically independent experiments). The data were assessed using one-way ANOVA (Supplementary Fig. 10b-10d) and are presented as mean  $\pm$  SEM. \*p<0.05. Source data are provided as a Source Data file. kd, relative molecular weight in kilodalton.

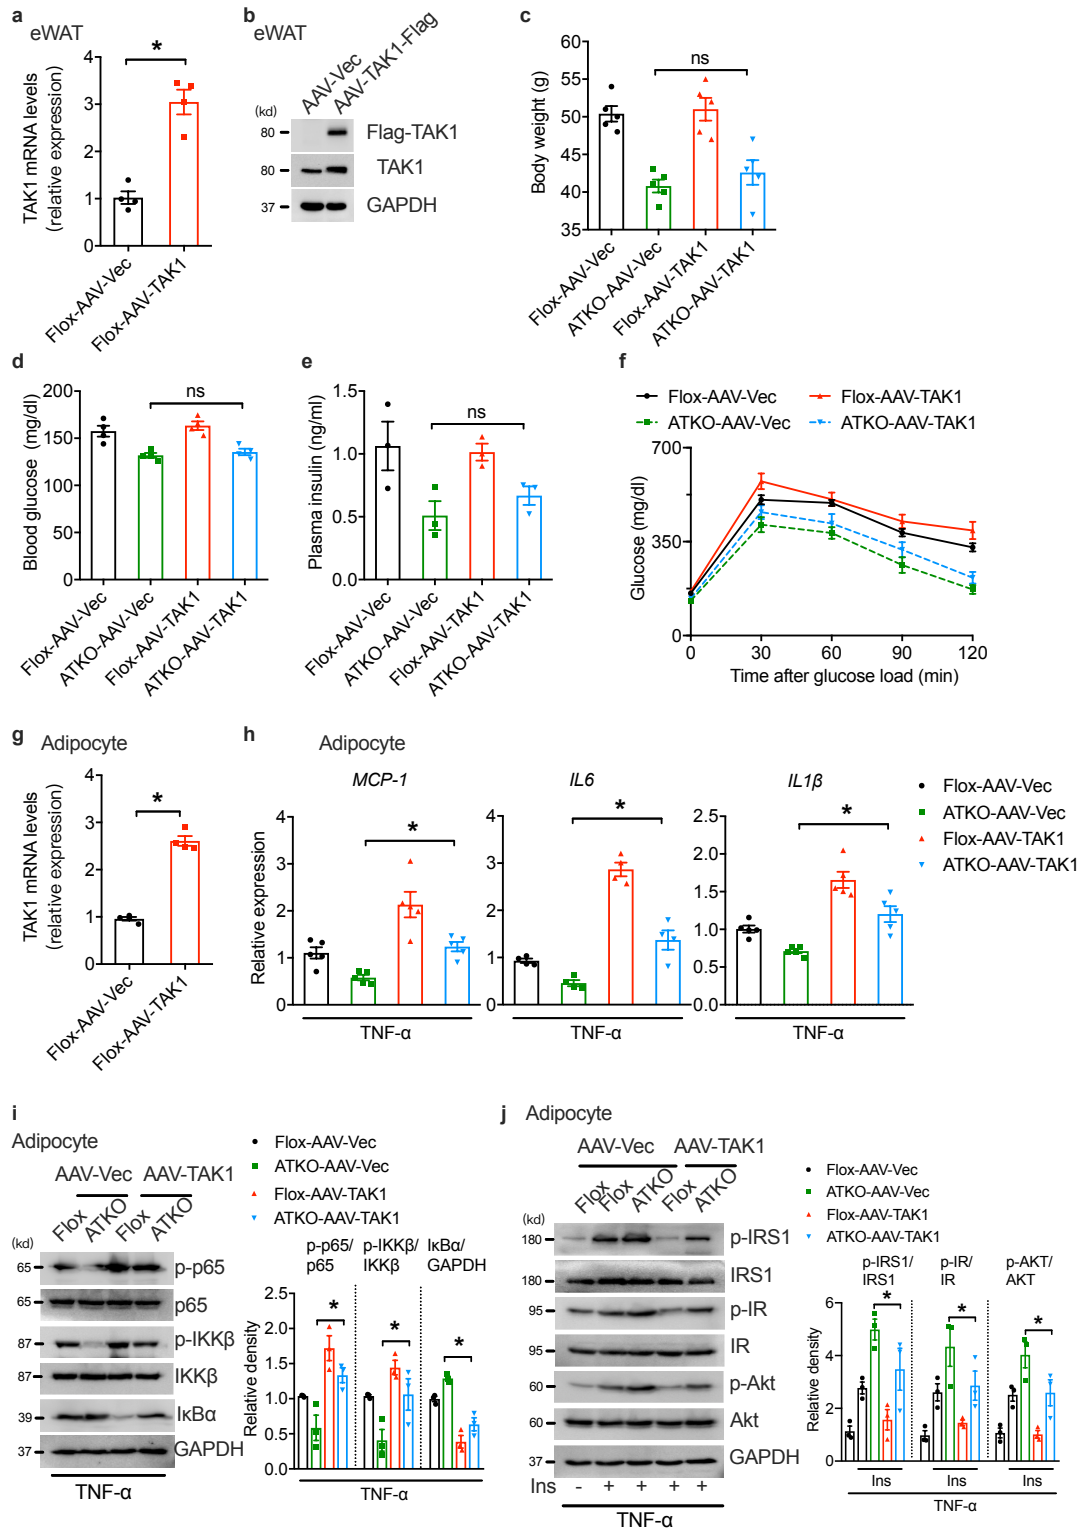

**Supplementary Fig. 11. Adipose TAK1 overexpression augments adipose inflammation in TRPM7 knockout obese mice.** Related to Fig. 7. **a-b.** The mRNA (**a**) and protein level (**b**) of TAK1 in eWAT of HFD-fed mice injected with Ad-Flag or Ad-TAK1-Flag ( $n=4$  mice). **c-e.** Body weight (**c**,  $n=5$  mice), fasting blood glucose (**d**,  $n=4$  mice) and insulin (**e**,  $n=3$  mice) levels of HFD-fed Flox and ATKO mice injected with AAV-Vec or AAV-TAK1. **f.** Glucose tolerance test on the indicated groups of mice ( $n=4$  mice). **g.** The mRNA of TAK1 in isolated adipocytes from eWAT of HFD-fed

mice injected with AAV-Vec or AAV-TAK1 (n=4 mice). **h.** The levels of indicated mRNA in cultured primary adipocytes were analyzed by qPCR (n=5 mice for *MCP-1* and *IL1 $\beta$* , n=4 mice for *IL6*). **i.** The expression of proteins in NF- $\kappa$ B signaling cascade in the adipocytes isolated from the indicated groups. The isolated adipocytes were incubated with TNF- $\alpha$  (60 ng/ml; 15 min) (n=3 mice). **j.** Insulin (100 nM; 15 min)-stimulated activation of insulin signaling was examined by western blotting in isolated adipocytes from the indicated groups. The adipocytes were incubated with TNF- $\alpha$  (60 ng/ml; 15 min) prior to insulin stimulation (n=3 mice). Statistical data were assessed using two-sided Student's t test (Supplementary Fig. 11a and 11g) or one-way ANOVA statistical analysis (Supplementary Fig. 11c-11f, 11h-11j) and are presented as mean  $\pm$  SEM. \*p<0.05. Source data are provided as a Source Data file. kd, relative molecular weight in kilodalton; ns, not significant.



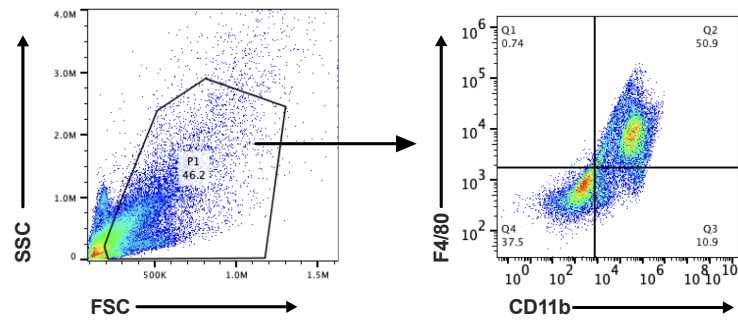

**Supplementary Fig. 12.** Gating strategy of flow cytometry for analysis of adipose tissue macrophage number.

**Supplementary Table 1.** Sequences of the primers for TRPM7 LoxP and Adipoq-Cre mice genotyping.

| Primer name | Forward primer sequence (5'to 3') | Reverse primer sequence (5'to 3') |
|-------------|-----------------------------------|-----------------------------------|
| LoxP        | TTTCTCCAATTAGCCCTGTAG A           | CTTGCCATTTTACCCAAATC              |
| Adipoq-Cre  | ACGGACAGAAGCATTTTCCA              | GGATGTGCCATGTGAGTCTG              |

**Supplementary Table 2.** Target sequences of siRNAs.

| Target Name | Target Sequence     |
|-------------|---------------------|
| CaMKII      | CACCACCATTGAGGACGAA |
| TRAF6       | CATTAAGGATGATACATTA |
| TRPM7       | CCTGATGAGGTTGTCACAG |

**Supplementary Table 3.** Gene primers used for qPCR.

| Genes             | Primer sequences        |
|-------------------|-------------------------|
| mCcl2 F           | TTAAAAACCTGGATCGGAACCAA |
| mCcl2 R           | GCATTAGCTTCAGATTTACGGGT |
| mTnfa F           | TATGGCTCAGGGTCCAACCTC   |
| mTnfa R           | CTCCCTTTGCAGAACTCAGG    |
| mIL6 F            | AGTTGCCTTCTTGGGACTGA    |
| mIL6 R            | CAGAATTGCCATTGCACAAC    |
| mIL1b F           | GCCATCCTCTGTGACTCAT     |
| mIL1b R           | AGGCCACAGGTATTTTGTCG    |
| b-actin F         | ACTGTGCCCATCTACGAGG     |
| b-actin R         | CAGGCAGCTCATAGCTCTT     |
| mTAK1 F           | AGGTTGTCGGAAGAGGAGCT    |
| mTAK1 R           | CTCCACAATGAAAGCCTTCC    |
| mF4/80 (Adgre1) F | ACCACAATACCTACATGCACC   |
| mF4/80 (Adgre1) R | AAGCAGGCGAGGAAAAGATAG   |
| mTRPM7 F          | TTTGGTGTTCCCAGAAAAGC    |
| mTRPM7 R          | ACCAAGTTCAGGACCACAG     |
